# Supplementary material
Source: publisher figshare collection journal article supplement (https://acs.figshare.com/ndownloader/files/4491652)
Supplement: Supplementary file 1 [file 4491652]

# Nanosphere Lithography at the Gas/Liquid Interface: A General Approach towards Free-Standing High-Quality Nanonets

Cheng Li, Guosong Hong, Limin Qi\*

*Beijing National Laboratory for Molecular Science (BNLMS), State Key Laboratory for Structural Chemistry of Unstable and Stable Species, College of Chemistry, Peking University, Beijing 100871, People's Republic of China.*

*E-mail: liminqi@pku.edu.cn*

## Supporting Information

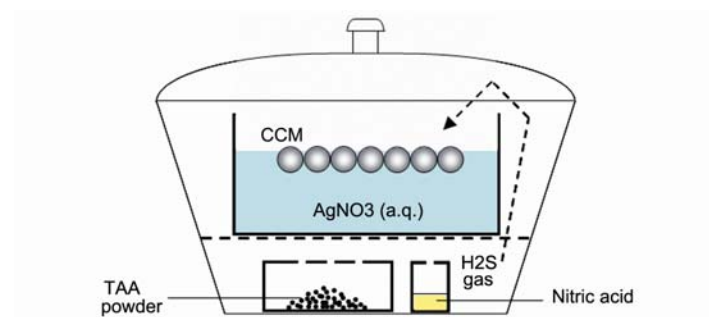

**Scheme S1.** Schematic illustration of the experimental setup for the preparation of free-standing  $\text{Ag}_2\text{S}$  nanonets through gas/liquid reactions masked by floating CCMs.

**Table S1.** Summary of the experimental parameters.

| Product                 | $\text{Ag}_2\text{S}$                  | $\text{PbS}$                          | $\text{Ag}$               | $\text{CaCO}_3$                                                           |
|-------------------------|----------------------------------------|---------------------------------------|---------------------------|---------------------------------------------------------------------------|
| Colloidal spheres       | PSt                                    | PSt                                   | P(St-MMA-AA)              | PSt                                                                       |
| Reactant subphase       | $\text{AgNO}_3$ (0.010 M)              | $\text{Pb}(\text{NO}_3)_2$ (0.20 M)   | $\text{AgNO}_3$ (0.010 M) | $\text{CaCl}_2$ (0.020 M), poly (acrylic acid ) ( $M_w = 5100$ , 80 mg/L) |
| Source for reactive gas | TAA (1.0 g), nitric acid (7 M, 1.5 mL) | TAA (1.0g), acetic acid (7 M, 1.5 mL) | Hydrazine (80%, 5.0 mL)   | $(\text{NH}_4)_2\text{CO}_3$ powder (2.0 g)                               |

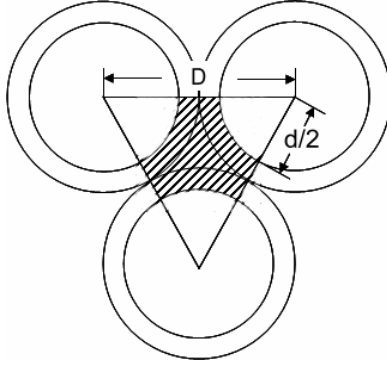

**Scheme S2.** The volume fraction of  $\text{Ag}_2\text{S}$  in the nanonet thin films ( $f_{\text{Ag}_2\text{S}}$ ) is estimated by dividing the shadowed area by the triangular area, which gives

$$f_{\text{Ag}_2\text{S}} = 1 - \frac{\sqrt{3}}{6} \pi \frac{d^2}{D^2}, \text{ where } D \text{ is the sphere diameter and } d \text{ is the hole diameter.}$$

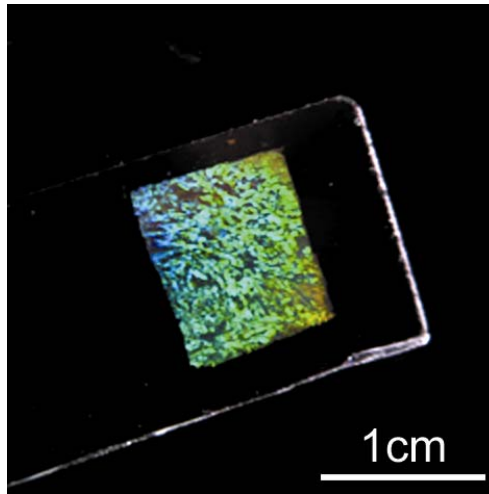

**Figure S1.** Optical photograph of a piece of  $\text{Ag}_2\text{S}$  nanonet suspended on a glass substrate showing a bright green color.

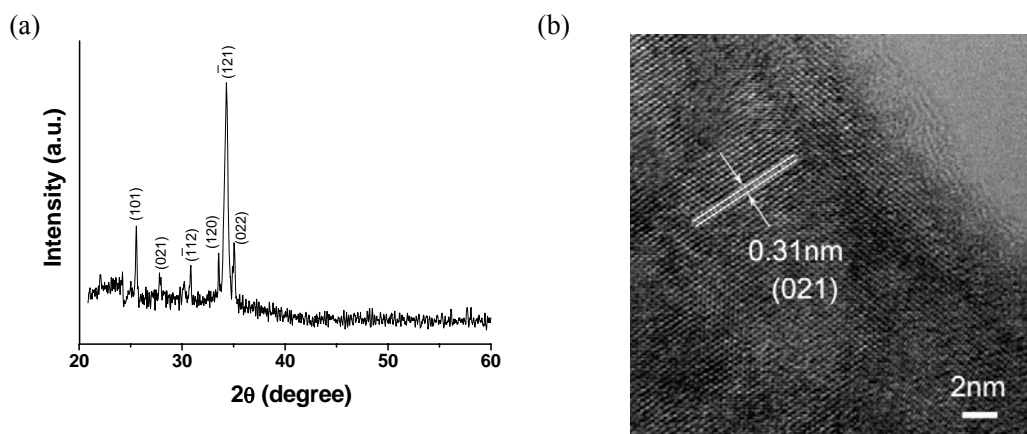

**Figure S2.** XRD pattern (a) and HRTEM image (b) of Ag<sub>2</sub>S nanonets. The diffraction peaks are indexed to the acanthite structure of  $\alpha$ -Ag<sub>2</sub>S (JCPDS No. 89-3840).

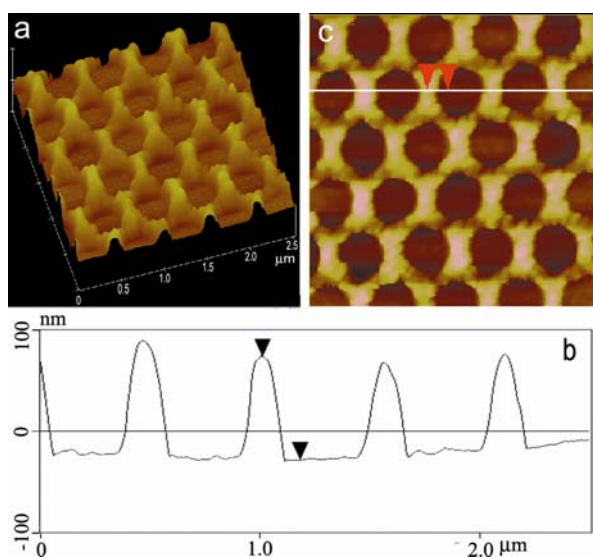

**Figure S3.** AFM image (a) and section analysis (b, c) of Ag<sub>2</sub>S nanonets. The AFM images were acquired using a Nanoscope IV multimode atomic force microscope (Digital Instruments, Santa Barbara, USA) in tapping mode under ambient conditions.
